# Supplementary material for: Evolutionary history of Tibetans inferred from whole-genome sequencing
Source: PLoS Genet. 2017 Apr 27;13(4):e1006675. doi: 10.1371/journal.pgen.1006675 (PMC5407610; doi:10.1371/journal.pgen.1006675)
Supplement: S2 Table — (XLSX) [file pgen.1006675.s012.xlsx]

## Sheet: q0.3.txt
chromosome	hg19 coordinate	CMS score	p-value	q-value
chr1	231344589	-41.6722	6.76701e-07	0.0141097
chr1	231351737	-42.9162	6.76701e-07	0.0141097
chr1	231359259	-43.07	6.76701e-07	0.0141097
chr1	231363536	-43.769	6.76701e-07	0.0141097
chr1	231388234	-45.2036	6.76701e-07	0.0141097
chr1	231323568	-45.6785	6.76701e-07	0.0141097
chr1	231732185	-45.7189	6.76701e-07	0.0141097
chr1	231396884	-45.9364	6.76701e-07	0.0141097
chr1	231702791	-46.0633	6.76701e-07	0.0141097
chr2	46597756	-46.4176	6.76701e-07	0.0141097
chr1	231335357	-46.5825	6.76701e-07	0.0141097
chr1	231712252	-46.7729	6.76701e-07	0.0141097
chr1	231723425	-46.9203	6.76701e-07	0.0141097
chr1	231727094	-46.9203	6.76701e-07	0.0141097
chr1	231721607	-46.9203	6.76701e-07	0.0141097
chr1	231723346	-46.9203	6.76701e-07	0.0141097
chr1	231726761	-46.9203	6.76701e-07	0.0141097
chr1	231725250	-46.9203	6.76701e-07	0.0141097
chr2	46598025	-47.2153	6.76701e-07	0.0141097
chr2	46635648	-47.6748	6.76701e-07	0.0141097
chr1	231730510	-47.6768	6.76701e-07	0.0141097
chr1	231730771	-47.6768	6.76701e-07	0.0141097
chr1	231730693	-47.6768	6.76701e-07	0.0141097
chr1	231731042	-47.7176	6.76701e-07	0.0141097
chr1	231324257	-47.9495	6.76701e-07	0.0141097
chr2	46722636	-48.3221	6.76701e-07	0.0141097
chr2	46719609	-48.3221	6.76701e-07	0.0141097
chr1	231731892	-48.4833	6.76701e-07	0.0141097
chr1	231731931	-48.4833	6.76701e-07	0.0141097
chr1	231731928	-48.4833	6.76701e-07	0.0141097
chr1	231341969	-48.6092	6.76701e-07	0.0141097
chr1	231339713	-48.7229	6.76701e-07	0.0141097
chr1	231341569	-48.7229	6.76701e-07	0.0141097
chr1	231340396	-48.7229	6.76701e-07	0.0141097
chr2	46720802	-48.7982	6.76701e-07	0.0141097
chr2	46720010	-48.7982	6.76701e-07	0.0141097
chr2	46583581	-48.9494	6.76701e-07	0.0141097
chr2	46594122	-48.9494	6.76701e-07	0.0141097
chr2	46635181	-48.9651	6.76701e-07	0.0141097
chr2	46592807	-48.9719	6.76701e-07	0.0141097
chr1	231322749	-49.1694	6.76701e-07	0.0141097
chr2	46732521	-49.3093	6.76701e-07	0.0141097
chr1	231750210	-49.4764	6.76701e-07	0.0141097
chr1	231740697	-49.4764	6.76701e-07	0.0141097
chr1	231740915	-49.4764	6.76701e-07	0.0141097
chr2	46600661	-49.4833	6.76701e-07	0.0141097
chr2	46644946	-49.4908	6.76701e-07	0.0141097
chr2	46644137	-49.4908	6.76701e-07	0.0141097
chr2	46633930	-49.5004	6.76701e-07	0.0141097
chr2	46631429	-49.5314	6.76701e-07	0.0141097
chr2	46588019	-49.9058	6.76701e-07	0.0141097
chr2	46588331	-49.9058	6.76701e-07	0.0141097
chr2	46600030	-49.9058	6.76701e-07	0.0141097
chr2	46589032	-49.9058	6.76701e-07	0.0141097
chr1	231738845	-50.0065	6.76701e-07	0.0141097
chr2	46723365	-50.0728	6.76701e-07	0.0141097
chr2	46720473	-50.0817	6.76701e-07	0.0141097
chr2	46730100	-50.0817	6.76701e-07	0.0141097
chr1	231747807	-50.1667	6.76701e-07	0.0141097
chr1	231739092	-50.1851	6.76701e-07	0.0141097
chr1	231739102	-50.1851	6.76701e-07	0.0141097
chr2	46733738	-50.2657	6.76701e-07	0.0141097
chr2	46732044	-50.2657	6.76701e-07	0.0141097
chr2	46738390	-50.2657	6.76701e-07	0.0141097
chr2	46630395	-50.279	6.76701e-07	0.0141097
chr2	46657114	-50.3448	6.76701e-07	0.0141097
chr2	46652428	-50.4306	6.76701e-07	0.0141097
chr2	46577251	-50.5401	6.76701e-07	0.0141097
chr2	46576918	-50.5401	6.76701e-07	0.0141097
chr2	46729845	-50.6799	6.76701e-07	0.0141097
chr2	46630861	-50.6951	6.76701e-07	0.0141097
chr1	231448497	-50.7507	6.76701e-07	0.0141097
chr1	231748577	-50.8119	6.76701e-07	0.0141097
chr2	46615955	-50.8705	6.76701e-07	0.0141097
chr2	46614235	-50.8705	6.76701e-07	0.0141097
chr2	46614463	-50.8705	6.76701e-07	0.0141097
chr2	46614202	-50.8705	6.76701e-07	0.0141097
chr1	231736942	-50.8754	6.76701e-07	0.0141097
chr1	231736429	-50.8754	6.76701e-07	0.0141097
chr2	46628633	-50.9288	6.76701e-07	0.0141097
chr2	46649049	-50.934	6.76701e-07	0.0141097
chr2	46637364	-50.934	6.76701e-07	0.0141097
chr2	46643831	-50.934	6.76701e-07	0.0141097
chr1	231336946	-51.0073	6.76701e-07	0.0141097
chr1	231336409	-51.0073	6.76701e-07	0.0141097
chr2	46689216	-51.0865	6.76701e-07	0.0141097
chr2	46693330	-51.0865	6.76701e-07	0.0141097
chr2	46692875	-51.0865	6.76701e-07	0.0141097
chr2	46692538	-51.0865	6.76701e-07	0.0141097
chr2	46693993	-51.0865	6.76701e-07	0.0141097
chr2	46686760	-51.0865	6.76701e-07	0.0141097
chr2	46704937	-51.0865	6.76701e-07	0.0141097
chr2	46682769	-51.0865	6.76701e-07	0.0141097
chr2	46681989	-51.0865	6.76701e-07	0.0141097
chr2	46705158	-51.0865	6.76701e-07	0.0141097
chr2	46691903	-51.0865	6.76701e-07	0.0141097
chr2	46691256	-51.0865	6.76701e-07	0.0141097
chr2	46687977	-51.0865	6.76701e-07	0.0141097
chr2	46684028	-51.0865	6.76701e-07	0.0141097
chr2	46705028	-51.0865	6.76701e-07	0.0141097
chr2	46690452	-51.0865	6.76701e-07	0.0141097
chr2	46682280	-51.0865	6.76701e-07	0.0141097
chr2	46690015	-51.0865	6.76701e-07	0.0141097
chr2	46679746	-51.0865	6.76701e-07	0.0141097
chr2	46688833	-51.0865	6.76701e-07	0.0141097
chr2	46675505	-51.1425	6.76701e-07	0.0141097
chr2	46676881	-51.1425	6.76701e-07	0.0141097
chr2	46726765	-51.1561	6.76701e-07	0.0141097
chr2	46727004	-51.1561	6.76701e-07	0.0141097
chr2	46728028	-51.1561	6.76701e-07	0.0141097
chr2	46724022	-51.1561	6.76701e-07	0.0141097
chr1	231327028	-51.2889	6.76701e-07	0.0141097
chr1	231327189	-51.2889	6.76701e-07	0.0141097
chr1	231327066	-51.2889	6.76701e-07	0.0141097
chr2	46714553	-51.6234	6.76701e-07	0.0141097
chr2	46748277	-51.6461	6.76701e-07	0.0141097
chr2	46671420	-51.8028	6.76701e-07	0.0141097
chr2	46674934	-51.8028	6.76701e-07	0.0141097
chr2	46733390	-51.8281	6.76701e-07	0.0141097
chr2	46734070	-51.8281	6.76701e-07	0.0141097
chr2	46734325	-51.8281	6.76701e-07	0.0141097
chr2	46710723	-51.8562	6.76701e-07	0.0141097
chr2	46710530	-51.8562	6.76701e-07	0.0141097
chr2	46710432	-51.8562	6.76701e-07	0.0141097
chr2	46658399	-51.8739	6.76701e-07	0.0141097
chr2	46656647	-51.8739	6.76701e-07	0.0141097
chr2	46660752	-51.8739	6.76701e-07	0.0141097
chr2	46659361	-51.8739	6.76701e-07	0.0141097
chr2	46651624	-51.8739	6.76701e-07	0.0141097
chr2	46581732	-51.8857	6.76701e-07	0.0141097
chr2	46717743	-52.0888	6.76701e-07	0.0141097
chr2	46718090	-52.0888	6.76701e-07	0.0141097
chr2	46753277	-52.1156	6.76701e-07	0.0141097
chr2	46753151	-52.1156	6.76701e-07	0.0141097
chr2	46752178	-52.1156	6.76701e-07	0.0141097
chr2	46754702	-52.1156	6.76701e-07	0.0141097
chr2	46752876	-52.1156	6.76701e-07	0.0141097
chr2	46752292	-52.1156	6.76701e-07	0.0141097
chr1	231746430	-52.1369	6.76701e-07	0.0141097
chr2	46569770	-52.3228	6.76701e-07	0.0141097
chr2	46568680	-52.3228	6.76701e-07	0.0141097
chr2	46569017	-52.3228	6.76701e-07	0.0141097
chr2	46570342	-52.3228	6.76701e-07	0.0141097
chr1	231327788	-52.3743	6.76701e-07	0.0141097
chr2	46571017	-52.3787	6.76701e-07	0.0141097
chr1	231322217	-52.467	6.76701e-07	0.0141097
chr2	46707674	-52.4906	6.76701e-07	0.0141097
chr2	46743164	-52.5984	6.76701e-07	0.0141097
chr2	46749267	-52.5984	6.76701e-07	0.0141097
chr2	46669944	-52.6716	6.76701e-07	0.0141097
chr2	46623947	-52.7258	6.76701e-07	0.0141097
chr2	46624372	-52.7258	6.76701e-07	0.0141097
chr1	231325629	-52.7568	6.76701e-07	0.0141097
chr1	231323693	-52.7568	6.76701e-07	0.0141097
chr2	46734652	-52.7804	6.76701e-07	0.0141097
chr2	46735287	-52.7804	6.76701e-07	0.0141097
chr2	46737464	-52.7804	6.76701e-07	0.0141097
chr2	46597870	-52.839	6.76701e-07	0.0141097
chr2	46757984	-52.8776	6.76701e-07	0.0141097
chr2	46579273	-53.2296	6.76701e-07	0.0141097
chr1	231755552	-53.6632	6.76701e-07	0.0141097
chr2	46567916	-53.8944	6.76701e-07	0.0141097
chr2	46713201	-54.0403	6.76701e-07	0.0141097
chr2	46575388	-54.0969	6.76701e-07	0.0141097
chr2	46600894	-54.2578	6.76701e-07	0.0141097
chr2	46601496	-54.2578	6.76701e-07	0.0141097
chr2	46601414	-54.2578	6.76701e-07	0.0141097
chr2	46601112	-54.2578	6.76701e-07	0.0141097
chr1	231320720	-54.3085	6.76701e-07	0.0141097
chr2	46553044	-54.5507	6.76701e-07	0.0141097
chr2	46764070	-54.6137	6.76701e-07	0.0141097
chr2	46764692	-54.6137	6.76701e-07	0.0141097
chr2	46768078	-54.6137	6.76701e-07	0.0141097
chr2	46596433	-54.7112	6.76701e-07	0.0141097
chr1	231758084	-54.716	6.76701e-07	0.0141097
chr2	46552352	-54.7216	6.76701e-07	0.0141097
chr2	46552202	-54.7216	6.76701e-07	0.0141097
chr1	231823483	-54.7812	6.76701e-07	0.0141097
chr1	231823361	-54.7812	6.76701e-07	0.0141097
chr1	231823390	-54.7812	6.76701e-07	0.0141097
chr1	231825230	-54.7812	6.76701e-07	0.0141097
chr2	46745452	-54.8225	6.76701e-07	0.0141097
chr2	46745424	-54.8225	6.76701e-07	0.0141097
chr2	46742041	-54.8225	6.76701e-07	0.0141097
chr2	46745024	-54.8225	6.76701e-07	0.0141097
chr1	231854370	-54.9371	6.76701e-07	0.0141097
chr2	46597827	-55.1303	6.76701e-07	0.0141097
chr2	46551835	-55.2476	6.76701e-07	0.0141097
chr1	231730867	-55.3489	6.76701e-07	0.0141097
chr2	46629712	-55.3761	6.76701e-07	0.0141097
chr2	46772997	-55.3874	6.76701e-07	0.0141097
chr2	46622473	-55.5504	6.76701e-07	0.0141097
chr2	46622081	-55.5504	6.76701e-07	0.0141097
chr2	46622245	-55.5504	6.76701e-07	0.0141097
chr2	46618781	-55.5565	6.76701e-07	0.0141097
chr2	46617118	-55.5565	6.76701e-07	0.0141097
chr2	46617182	-55.5565	6.76701e-07	0.0141097
chr1	231757882	-55.6619	6.76701e-07	0.0141097
chr1	231757031	-55.6619	6.76701e-07	0.0141097
chr1	231828200	-55.7372	6.76701e-07	0.0141097
chr1	231828041	-55.7372	6.76701e-07	0.0141097
chr1	231828715	-55.7372	6.76701e-07	0.0141097
chr2	46568084	-55.8133	6.76701e-07	0.0141097
chr2	46627353	-56.3284	6.76701e-07	0.0141097
chr2	46626352	-56.3284	6.76701e-07	0.0141097
chr2	46602678	-56.3959	6.76701e-07	0.0141097
chr2	46602722	-56.3959	6.76701e-07	0.0141097
chr2	46603438	-56.3959	6.76701e-07	0.0141097
chr2	46603165	-56.3959	6.76701e-07	0.0141097
chr2	46603260	-56.3959	6.76701e-07	0.0141097
chr1	231768677	-56.4307	6.76701e-07	0.0141097
chr1	231807047	-56.5083	6.76701e-07	0.0141097
chr2	46609966	-56.6383	6.76701e-07	0.0141097
chr1	231859514	-56.817	6.76701e-07	0.0141097
chr2	46553781	-56.8618	6.76701e-07	0.0141097
chr1	231699966	-56.896	6.76701e-07	0.0141097
chr2	46629693	-57.1269	6.76701e-07	0.0141097
chr1	231761174	-57.1675	6.76701e-07	0.0141097
chr2	46558530	-57.1718	6.76701e-07	0.0141097
chr2	46584859	-57.1825	6.76701e-07	0.0141097
chr2	46561659	-57.1989	6.76701e-07	0.0141097
chr2	46561400	-57.1989	6.76701e-07	0.0141097
chr1	231903010	-57.244	6.76701e-07	0.0141097
chr1	231906847	-57.244	6.76701e-07	0.0141097
chr2	46610212	-57.288	6.76701e-07	0.0141097
chr2	46749188	-57.2881	6.76701e-07	0.0141097
chr2	46747657	-57.2881	6.76701e-07	0.0141097
chr2	46577299	-57.301	6.76701e-07	0.0141097
chr1	231803468	-57.306	6.76701e-07	0.0141097
chr2	46604512	-57.408	6.76701e-07	0.0141097
chr2	46608542	-57.408	6.76701e-07	0.0141097
chr2	46603671	-57.4338	6.76701e-07	0.0141097
chr2	46686533	-57.5055	6.76701e-07	0.0141097
chr2	46778268	-57.6675	1.3534e-06	0.0267282
chr13	77399462	-57.7572	1.3534e-06	0.0267282
chr13	77398842	-57.7671	1.3534e-06	0.0267282
chr13	77405193	-57.8638	1.3534e-06	0.0267282
chr1	231702925	-57.872	1.3534e-06	0.0267282
chr1	231729265	-57.9221	1.3534e-06	0.0267282
chr2	46605954	-58.0577	1.3534e-06	0.0267282
chr2	46583593	-58.0632	1.3534e-06	0.0267282
chr2	46767692	-58.3607	1.3534e-06	0.0267282
chr1	231442063	-58.4273	1.3534e-06	0.0267282
chr21	37864147	-58.5365	1.3534e-06	0.0267282
chr2	46634645	-58.5463	1.3534e-06	0.0267282
chr2	46577797	-58.598	1.3534e-06	0.0267282
chr1	231333752	-58.6647	2.0301e-06	0.0377881
chr2	46571435	-58.7329	2.0301e-06	0.0377881
chr2	46614517	-58.895	2.0301e-06	0.0377881
chr20	48175598	-58.9688	2.0301e-06	0.0377881
chr2	46550132	-59.1254	2.0301e-06	0.0377881
chr1	231707215	-59.3513	2.0301e-06	0.0377881
chr1	231704502	-59.3513	2.0301e-06	0.0377881
chr1	231707414	-59.3513	2.0301e-06	0.0377881
chr1	231704366	-59.3513	2.0301e-06	0.0377881
chr2	46773515	-59.5465	2.0301e-06	0.0377881
chr1	231725964	-59.6984	2.0301e-06	0.0377881
chr1	231728781	-59.6984	2.0301e-06	0.0377881
chr21	37855974	-59.807	2.0301e-06	0.0377881
chr21	37856001	-59.807	2.0301e-06	0.0377881
chr7	35523620	-59.822	2.0301e-06	0.0377881
chr1	231344283	-59.8496	2.7068e-06	0.0474739
chr21	37866276	-59.8545	2.7068e-06	0.0474739
chr20	1861406	-59.927	2.7068e-06	0.0474739
chr1	231324483	-60.0142	2.7068e-06	0.0474739
chr2	46600358	-60.0282	2.7068e-06	0.0474739
chr1	231664753	-60.1482	2.7068e-06	0.0474739
chr1	231669827	-60.1482	2.7068e-06	0.0474739
chr1	231689632	-60.1482	2.7068e-06	0.0474739
chr2	46567227	-60.1494	2.7068e-06	0.0474739
chr21	37867353	-60.2706	2.7068e-06	0.0474739
chr1	231733409	-60.2747	2.7068e-06	0.0474739
chr12	48363253	-60.332	2.7068e-06	0.0474739
chr12	48359527	-60.332	2.7068e-06	0.0474739
chr2	46576488	-60.4128	2.7068e-06	0.0474739
chr1	231557623	-60.4278	2.7068e-06	0.0474739
chr1	231730837	-60.4838	2.7068e-06	0.0474739
chr1	231897303	-60.9221	4.06021e-06	0.06897
chr12	48337328	-61.0213	4.06021e-06	0.06897
chr10	101664406	-61.0239	4.06021e-06	0.06897
chr10	101683430	-61.0239	4.06021e-06	0.06897
chr2	46597581	-61.0422	4.06021e-06	0.06897
chr1	231353462	-61.0936	4.06021e-06	0.06897
chr12	48338196	-61.2822	4.06021e-06	0.06897
chr21	37836973	-61.5437	4.06021e-06	0.06897
chr13	77378411	-61.6287	4.06021e-06	0.06897
chr7	52714693	-61.6743	4.73691e-06	0.0796297
chr21	37848334	-61.6989	4.73691e-06	0.0796297
chr2	46549389	-61.8382	4.73691e-06	0.0796297
chr7	52598184	-61.8946	5.41361e-06	0.0903799
chr10	101664168	-62.0998	5.41361e-06	0.0903799
chr2	44084189	-62.3083	6.09031e-06	0.100983
chr20	61013848	-62.3646	6.09031e-06	0.100983
chr12	48357014	-62.4939	7.44371e-06	0.119746
chr12	48320402	-62.5899	7.44371e-06	0.119746
chr2	46841584	-62.6867	7.44371e-06	0.119746
chr2	46840552	-62.6867	7.44371e-06	0.119746
chr2	46844352	-62.6867	7.44371e-06	0.119746
chr17	77446207	-62.6988	7.44371e-06	0.119746
chr5	146779272	-62.759	7.44371e-06	0.119746
chr19	8178207	-62.7638	7.44371e-06	0.119746
chr22	26211857	-62.8093	7.44371e-06	0.119746
chr6	16700098	-62.8666	8.12041e-06	0.130201
chr6	134385155	-63.0672	1.01505e-05	0.161684
chr21	37835982	-63.0743	1.01505e-05	0.161684
chr2	46593536	-63.0949	1.08272e-05	0.171339
chr7	27549296	-63.1017	1.08272e-05	0.171339
chr2	46824947	-63.1221	1.15039e-05	0.174108
chr2	46834348	-63.1221	1.15039e-05	0.174108
chr2	46836292	-63.1221	1.15039e-05	0.174108
chr2	46825983	-63.1221	1.15039e-05	0.174108
chr2	46836216	-63.1221	1.15039e-05	0.174108
chr7	52571673	-63.2824	1.15039e-05	0.174108
chr1	231554531	-63.3158	1.15039e-05	0.174108
chr2	41056487	-63.324	1.15039e-05	0.174108
chr2	41062810	-63.324	1.15039e-05	0.174108
chr2	41056421	-63.324	1.15039e-05	0.174108
chr2	42307395	-63.3266	1.15039e-05	0.174108
chr20	61012835	-63.439	1.15039e-05	0.174108
chr16	83794096	-63.4487	1.15039e-05	0.174108
chr16	83795480	-63.4487	1.15039e-05	0.174108
chr6	16697651	-63.5163	1.21806e-05	0.179867
chr2	41059081	-63.5433	1.21806e-05	0.179867
chr2	46818803	-63.5484	1.21806e-05	0.179867
chr16	83790171	-63.5555	1.21806e-05	0.179867
chr17	77447992	-63.6266	1.21806e-05	0.179867
chr3	38718235	-63.6643	1.21806e-05	0.179867
chr1	231658301	-63.6805	1.21806e-05	0.179867
chr15	33468481	-63.7226	1.21806e-05	0.179867
chr6	133815465	-63.8429	1.28573e-05	0.189284
chr6	133512533	-64.1182	1.55641e-05	0.225714
chr6	107999613	-64.1243	1.55641e-05	0.225714
chr6	107999980	-64.1243	1.55641e-05	0.225714
chr6	107999941	-64.1243	1.55641e-05	0.225714
chr6	107999963	-64.1243	1.55641e-05	0.225714
chr3	28763088	-64.1757	1.62408e-05	0.234129
chr3	28770499	-64.1757	1.62408e-05	0.234129
chr19	39933990	-64.2002	1.69175e-05	0.241024
chr16	83802299	-64.2223	1.69175e-05	0.241024
chr16	83789860	-64.2596	1.69175e-05	0.241024
chr7	27378058	-64.2773	1.69175e-05	0.241024
chr22	39488481	-64.338	1.89476e-05	0.269158
chr1	231546452	-64.431	1.96243e-05	0.276346
chr3	193929504	-64.4532	1.96243e-05	0.276346
chr2	46609957	-64.4596	1.96243e-05	0.276346
chr3	193931423	-64.6409	2.16544e-05	0.29401
chr7	52583457	-64.6703	2.16544e-05	0.29401
chr16	83786272	-64.6706	2.16544e-05	0.29401
chr2	46589323	-64.6712	2.16544e-05	0.29401
chr7	52788814	-64.7154	2.16544e-05	0.29401
chr1	231560220	-64.7509	2.16544e-05	0.29401
chr1	231559226	-64.7509	2.16544e-05	0.29401
chr2	46732934	-64.8009	2.23311e-05	0.29401
chr2	46580474	-64.8433	2.23311e-05	0.29401
chr2	46579409	-64.8494	2.23311e-05	0.29401
chr2	46623611	-64.8518	2.23311e-05	0.29401
chr2	46851867	-64.9283	2.23311e-05	0.29401
chr2	46846131	-64.9283	2.23311e-05	0.29401
chr2	46845632	-64.9283	2.23311e-05	0.29401
chr2	46854889	-64.9283	2.23311e-05	0.29401
chr2	46845576	-64.9283	2.23311e-05	0.29401
chr7	52786522	-64.9468	2.23311e-05	0.29401
chr7	52783916	-64.9468	2.23311e-05	0.29401
chr2	35673394	-64.9748	2.23311e-05	0.29401
chr21	39951627	-65.0886	2.23311e-05	0.29401
chr7	52790941	-65.0998	2.23311e-05	0.29401
chr7	52791522	-65.0998	2.23311e-05	0.29401
chr7	52782137	-65.135	2.23311e-05	0.29401
chr22	39491379	-65.1423	2.23311e-05	0.29401
chr1	231327666	-65.1813	2.30078e-05	0.296492
chr1	231327859	-65.1813	2.30078e-05	0.296492
chr7	27540325	-65.1998	2.30078e-05	0.296492
chr14	72563834	-65.2012	2.30078e-05	0.296492
chr10	16885658	-65.2103	2.30078e-05	0.296492
chr2	46870805	-65.2441	2.30078e-05	0.296492
chr2	46866888	-65.2441	2.30078e-05	0.296492
chr2	46869861	-65.2441	2.30078e-05	0.296492
