# Supplementary material for: Evolutionary history of Tibetans inferred from whole-genome sequencing
Source: PLoS Genet. 2017 Apr 27;13(4):e1006675. doi: 10.1371/journal.pgen.1006675 (PMC5407610; doi:10.1371/journal.pgen.1006675)
Supplement: S5 Table — Red-color indicates SNVs present in the Denisovan genome. (XLSX) [file pgen.1006675.s015.xlsx]

## Sheet: Sheet1
	46583581	46588019	46588331	46589032	46592807	46594122	46597756	46598025	46600030	46600661	46630395	46631429	46633930	46635181	46635648	46644137	46644946	46652428	46657114	46719609	46720010	46720473	46720802	46722636	46723365	46730100	46732044	46732521	46733738	46738390
46583581	1	1	1	1	0.92437	1	1	1	1	0.847483	0.779297	0.707578	0.77502	0.92437	0.847483	0.855615	0.855615	0.717321	0.855615	0.792839	0.792839	0.855615	0.792839	0.792839	0.792839	0.855615	0.735294	0.735294	0.735294	0.735294
46588019	1	1	1	1	0.92437	1	1	1	1	0.847483	0.779297	0.707578	0.77502	0.92437	0.847483	0.855615	0.855615	0.717321	0.855615	0.792839	0.792839	0.855615	0.792839	0.792839	0.792839	0.855615	0.735294	0.735294	0.735294
46588331	1	1	1	1	0.92437	1	1	1	1	0.847483	0.779297	0.707578	0.77502	0.92437	0.847483	0.855615	0.855615	0.717321	0.855615	0.792839	0.792839	0.855615	0.792839	0.792839	0.792839	0.855615	0.735294	0.735294
46589032	1	1	1	1	0.92437	1	1	1	1	0.847483	0.779297	0.707578	0.77502	0.92437	0.847483	0.855615	0.855615	0.717321	0.855615	0.792839	0.792839	0.855615	0.792839	0.792839	0.792839	0.855615	0.735294
46592807	0.92437	0.92437	0.92437	0.92437	1	0.92437	0.92437	0.92437	0.92437	0.779297	0.712599	0.6466	0.71245	0.850228	0.779297	0.782836	0.782836	0.652007	0.782836	0.721317	0.721317	0.782836	0.721317	0.721317	0.721317	0.782836
46594122	1	1	1	1	0.92437	1	1	1	1	0.847483	0.779297	0.707578	0.77502	0.92437	0.847483	0.855615	0.855615	0.717321	0.855615	0.792839	0.792839	0.855615	0.792839	0.792839	0.792839
46597756	1	1	1	1	0.92437	1	1	1	1	0.847483	0.779297	0.707578	0.77502	0.92437	0.847483	0.855615	0.855615	0.717321	0.855615	0.792839	0.792839	0.855615	0.792839	0.792839
46598025	1	1	1	1	0.92437	1	1	1	1	0.847483	0.779297	0.707578	0.77502	0.92437	0.847483	0.855615	0.855615	0.717321	0.855615	0.792839	0.792839	0.855615	0.792839
46600030	1	1	1	1	0.92437	1	1	1	1	0.847483	0.779297	0.707578	0.77502	0.92437	0.847483	0.855615	0.855615	0.717321	0.855615	0.792839	0.792839	0.855615
46600661	0.847483	0.847483	0.847483	0.847483	0.779297	0.847483	0.847483	0.847483	0.847483	1	0.6466	0.707578	0.64008	0.779297	0.847483	0.717321	0.717321	0.855615	0.717321	0.792839	0.792839
46630395	0.779297	0.779297	0.779297	0.779297	0.712599	0.779297	0.779297	0.779297	0.779297	0.6466	1	0.92437	0.853061	0.850228	0.779297	0.782836	0.782836	0.652007	0.782836	0.721317
46631429	0.707578	0.707578	0.707578	0.707578	0.6466	0.707578	0.707578	0.707578	0.707578	0.707578	0.92437	1	0.77502	0.779297	0.847483	0.717321	0.717321	0.717321	0.717321
46633930	0.77502	0.77502	0.77502	0.77502	0.71245	0.77502	0.77502	0.77502	0.77502	0.64008	0.853061	0.77502	1	0.853061	0.77502	0.78961	0.78961	0.655579
46635181	0.92437	0.92437	0.92437	0.92437	0.850228	0.92437	0.92437	0.92437	0.92437	0.779297	0.850228	0.779297	0.853061	1	0.92437	0.92562	0.92562
46635648	0.847483	0.847483	0.847483	0.847483	0.779297	0.847483	0.847483	0.847483	0.847483	0.847483	0.779297	0.847483	0.77502	0.92437	1	0.855615
46644137	0.855615	0.855615	0.855615	0.855615	0.782836	0.855615	0.855615	0.855615	0.855615	0.717321	0.782836	0.717321	0.78961	0.92562	0.855615
46644946	0.855615	0.855615	0.855615	0.855615	0.782836	0.855615	0.855615	0.855615	0.855615	0.717321	0.782836	0.717321	0.78961	0.92562
46652428	0.717321	0.717321	0.717321	0.717321	0.652007	0.717321	0.717321	0.717321	0.717321	0.855615	0.652007	0.717321	0.655579
46657114	0.855615	0.855615	0.855615	0.855615	0.782836	0.855615	0.855615	0.855615	0.855615	0.717321	0.782836	0.717321
46719609	0.792839	0.792839	0.792839	0.792839	0.721317	0.792839	0.792839	0.792839	0.792839	0.792839	0.721317
46720010	0.792839	0.792839	0.792839	0.792839	0.721317	0.792839	0.792839	0.792839	0.792839	0.792839
46720473	0.855615	0.855615	0.855615	0.855615	0.782836	0.855615	0.855615	0.855615	0.855615
46720802	0.792839	0.792839	0.792839	0.792839	0.721317	0.792839	0.792839	0.792839
46722636	0.792839	0.792839	0.792839	0.792839	0.721317	0.792839	0.792839
46723365	0.792839	0.792839	0.792839	0.792839	0.721317	0.792839
46730100	0.855615	0.855615	0.855615	0.855615	0.782836
46732044	0.735294	0.735294	0.735294	0.735294
46732521	0.735294	0.735294	0.735294
46733738	0.735294	0.735294
46738390	0.735294
