# Supplementary material for: Evolutionary history of Tibetans inferred from whole-genome sequencing
Source: PLoS Genet. 2017 Apr 27;13(4):e1006675. doi: 10.1371/journal.pgen.1006675 (PMC5407610; doi:10.1371/journal.pgen.1006675)
Supplement: S9 Table — (XLSX) [file pgen.1006675.s019.xlsx]

## Sheet: Sheet1
ID	DNA source	Place of Origin
1	blood	Tibet
2	blood	Tibet
3	blood	Tibet
4	blood	Tibet
5	blood	Tibet
6	blood	Tibet
7	blood	Tibet
8	blood	Tibet
9	blood	Not provided
10	blood	Tibet
11	blood	Tibet
12	blood	Tibet
13	Saliva	Not provided
14	Saliva	Tibet
15	Saliva	Tibet
16	Saliva	India
17	Saliva	Tibet
18	Saliva	India
19	Saliva	Tibet
20	blood	Tibet
21	blood	Tibet
22	blood	Not provided
23	blood	Tibet
24	blood	Tibet
25	blood	Nepal
26	blood	India
27	blood	India
